# Supplementary material for: Dietary and Plasma Phospholipid Profiles in Vegans and Omnivores—Results from the RBVD Study
Source: MDPI journal article supplement (doi:10.3390/nu14142900), 2022-07-14
Supplement: s1 [file s1]

**Table S1.** Omega-6 to omega-3 ratios according to diet group and sex

|                                         | <b>Vegans</b>                       | <b>Omnivores</b>                 | <b>p-value</b> |
|-----------------------------------------|-------------------------------------|----------------------------------|----------------|
| <b>Dietary omega-6 to omega-3 ratio</b> |                                     |                                  |                |
| Total study population (n=72)           | 5.9:1 (4.5:1-7.5:1)                 | 5.3:1 (4.5:1-7.3:1)              | 0.8            |
| Women (n=36)                            | 5.5:1 (4.6:1-8.5) <sup>a</sup>      | 6.4:1 (5.0:1-7.8:1) <sup>b</sup> | 0.5            |
| Men (n=36)                              | 6.0:1 (4.3:1-7.2) <sup>a</sup>      | 4.8:1 (4.0:1-5.8:1) <sup>b</sup> | 0.3            |
| <b>Plasma omega-6 to omega-3 ratio</b>  |                                     |                                  |                |
| Total study population (n=72)           | 12.1:1 (10.5:1-14.6:1)              | 6.9:1 (6.0:1-8.3:1)              | p<0.0001       |
| Women (n=36)                            | 12.7:1 (10.9:1-15.6:1) <sup>a</sup> | 7.2:1 (6.0:1-8.2:1) <sup>a</sup> | p<0.0001       |
| Men (n=36)                              | 11.9:1 (9.8:1-14.4:1) <sup>a</sup>  | 6.6:1 (5.8:1-8.6:1) <sup>a</sup> | p<0.0001       |

<sup>a</sup> No statistical differences between men and women within diet group (p<0.5); <sup>b</sup> statistical differences between men and women within diet group (p=0.01)
